# Supplementary material
Source: PubMed Central journal article supplement (PMC4501573)
Supplement: NIHMS614025-supplement-01.pdf [file NIHMS614025-supplement-01.pdf]

## Supplementary Materials for **Hematopoietic Stem Cell Origin of *BRAFV600E* Mutations in Hairy Cell Leukemia**

Stephen S. Chung, Eunhee Kim, Jae H. Park, Young Rock Chung, Piro Lito, Julie Teruya-Feldstein, Wenhao Hu, Wendy Beguelin, Sebastien Monette, Cihangir Duy, Raajit Rampal, Leon Telis, Minal Patel, Min Kyung Kim, Kety Huberman, Nancy Bouvier, Michael F. Berger, Ari M. Melnick, Neal Rosen, Martin S. Tallman, Christopher Y. Park,\* Omar Abdel-Wahab\*

\*Corresponding author. E-mail: parkc@mskcc.org (C.Y.P.); abdelwao@mskcc.org (O.A.-W.)

Published 28 May 2014, *Sci. Transl. Med.* **6**, 238ra71 (2014)

DOI: 10.1126/scitranslmed.3008004

### The PDF file includes:

#### Materials and Methods

Fig. S1. HSPC abnormalities in HCL and the presence of *BRAFV600E* in HSCs.

Fig. S2. Effect of *BRafV600E* expression at different time points and stages of hematopoiesis.

Fig. S3. Effect of *BRafV600E* expression on fetal hematopoiesis and in mice with B cell-restricted expression of the mutant allele.

Fig. S4. Effect of *BRafV600E* expression on HSPC numbers and frequencies.

Fig. S5. Effect of *BRafV600E* expression on B cell development and self-renewal.

Fig. S6. Normalization of HSPC compartment and increased myeloid/erythroid output from *BRAFV600E*-mutant HSPCs after BRAF inhibition.

Table S1. Genotyping results of cell populations sorted from HCL patient BM aspirates.

Table S2. Three hundred genes sequenced in three HCL leukemic cell and granulocyte genomic DNA samples.

## **Supplementary Materials:**

### **Supplementary Materials and Methods:**

#### **Antibodies and FACS analysis of human and murine cells.**

All FACS antibodies (for both human and mouse studies) were purchased from BD-Pharmingen or eBioscience. For human studies, BM mononuclear cells were stained with a cocktail of PE-Cy5-conjugated lineage antibodies including CD3 (HIT3a), CD4 (RPA-T4), CD8 (RPA-T8), CD14 (TuK4), GPA (HIR2), and CD56 (B159). CD10 APCCy7 (HI10a) and CD19 PerCPCy5.5 (CC2C6) were excluded from the lineage cocktail and stained with different fluorochromes to assess B-lymphoid progenitor frequencies. CD34 Pacific Blue (581), CD38 PE-Cy7 (HIT2), CD90 PE (5E10), and CD45RA Alexa700 (HI100) were used to sort CD34<sup>+</sup>CD38<sup>-</sup>CD90<sup>+</sup>CD45RA<sup>-</sup> HSCs, as well as CD34<sup>+</sup>CD38<sup>+</sup> progenitors, excluding the above mentioned lineage markers including CD10 and CD19. CD123 APC (6H6) was used along with CD45RA Alexa700 to fractionate CD34<sup>+</sup>CD38<sup>+</sup> cells into myeloid progenitor subsets. Hairy cells were sorted using CD11c Biotin (Clone 3.9), CD103 FITC (B-Ly7), and CD19 PerCPCy5.5 (CC2C6) (with Streptavidin Qdot secondary). Peripheral blood mononuclear cells were stained with CD19 PerCPCy5.5 (HIB19), CD11c Biotin (Clone 3.9), CD103 FITC (B-Ly7), CD25 PE (BC96), CD3 PE-Cy5 7(SK7), and CD14 Pacific Blue (TuK4) to assess recovery of normal myeloid and T-cell populations. Hairy cell leukemic cells were sorted based on expression of CD19, CD11c, CD103, and CD25.

For mouse studies, BM or spleen mononuclear cells were stained with a lineage cocktail comprised of antibodies targeting CD4, CD8, B220, NK1.1, Gr-1, CD11b, Ter119, and IL-7R $\alpha$  (all conjugated to APCCy7). Cells were also stained with antibodies against c-Kit PE, Sca-1 APC, Fc $\gamma$ RII/III Pacific Blue, and CD34 FITC. Cell populations were analyzed using a FACS-Fortessa (Becton Dickinson) and sorted with a FACS Aria II instrument (Becton Dickinson). We used the following antibodies: c-Kit PE (2B8), Sca-1 APC (D7), Mac-1/CD11b APCCy7

(M1/70), Gr-1 APCCy7 (RB6-8C5), NK1.1 APCCy7 (PK136), Ter-119 APCCy7, IL7-R $\alpha$  FITC (A7R34), CD34 FITC (RAM34), Fc $\gamma$ RII/III Pacific Blue (2.4G2), CD4 APCCy7 (RM4-5), CD4 APCCy7 (H129.19), CD8 APCCy7 (53-6.7), CD45.1 FITC (A20), CD45.2 Pacific Blue (104), CD150 PE (9D1), CD48 FITC (HM48-1), Flk2 PECy7 (A2F10), B220 APCCy7 (RA3-6B2), BP-1 FITC (6C3), CD24 FITC (30-F1), CD43 PE (eBioR2/60), IgD PECy7 (11-26), IgM Pacific Blue (eB121-15F9).

The cell surface immunophenotype definitions used for murine HSPC analyses are listed below:

| Population | Marker                                                          |
|------------|-----------------------------------------------------------------|
| LSK        | Lineage-negative Sca1+ c-KIT+                                   |
| LT-HSC     | Lineage-negative Sca1+ c-KIT+ CD150+ CD48-                      |
| ST-HSC     | Lineage-negative Sca1+ c-KIT+ CD150+ CD48+                      |
| MPP        | Lineage-negative Sca1+ c-KIT+ CD150- CD48+                      |
| LMPP       | Lineage-negative Sca1+ c-KIT+ Flk2+                             |
| CLP        | Lineage-negative Sca1 intermediate+ c-KIT intermediate + IL7Ra+ |
| MP         | Lineage-negative Sca1- c-KIT+                                   |
| CMP        | Lineage-negative Sca1- c-KIT+ CD16/32- CD34+                    |
| GMP        | Lineage-negative Sca1- c-KIT+ CD16/32+ CD34+                    |
| MEP        | Lineage-negative Sca1- c-KIT+ CD16/32- CD34-                    |

For Western Blot analysis, the following antibodies were used: phospho-MEK1/2 (Ser217/221), phospho-ERK1/2 (Thr202/Tyr204), total MEK1/2, total ERK1/2, cyclin D1 (all Cell Signaling Technologies), and alpha-tubulin (Sigma Aldrich).

### **Animals, in vivo studies, and in vivo drug treatment of mice**

For transplantation experiments, freshly dissected femurs and tibias were isolated from *BRafV600E* CD45.2+ or *Mx1-cre BRafV600E* CD45.2+ mice. BM was flushed with a 3 cc insulin syringe into PBS. The BM was spun at 0.5 x g by centrifugation at 4<sup>0</sup>C, and red blood cells were lysed in ammonium chloride-potassium bicarbonate lysis buffer for 5 min. After centrifugation, cells were resuspended in PBS, passed through a cell strainer, and counted. For competitive transplantation experiments, 0.5 x 10<sup>6</sup> total BM cells of *BRafV600E* CD45.2+ or

*Mx1-cre BRafV600E* CD45.2+ mice were mixed with  $0.5 \times 10^6$  wild-type CD45.1+ support BM and transplanted via tail-vein injection into lethally irradiated (two times 450 cGy) CD45.1+ host mice. Chimerism was measured by FACS in peripheral blood every 4 weeks up to 16-weeks post-transplantation. Additionally, for each peripheral blood analysis, whole blood cell counts were measured on a blood analyzer, and blood smears were scored. Chimerism in the peripheral blood, BM and spleen was evaluated at 16 weeks via animal sacrifice and subsequent FACS analysis.

For competitive transplantation experiments performed with *Cre-ER<sup>T</sup>* mice, CD45.2 *Cre-ER<sup>T</sup> BRaf* wildtype or *Cre-ER<sup>T</sup> BRafV600E* BM cells were transplanted into CD45.1 congenic recipients as described above. In these experiments, however, Cre-mediated excision of the lox-stop-lox cassette was performed in recipient mice 2 weeks after transplantation with intraperitoneal injection of 5 mg tamoxifen every other day x 3 days.

For noncompetitive transplantation experiments,  $1.0 \times 10^6$  total BM cells of *BRafV600E* CD45.2+ or *Mx1-cre BRafV600E* CD45.2+ mice were transplanted via tail-vein injection into lethally irradiated (two times 450 cGy) CD45.1+ host mice.

For PLX4720 drug studies, all animals were dosed with vehicle (5% DMSO, 1% methylcellulose) or PLX4720 suspended in vehicle for 10 consecutive days at a dose of 50 mg twice daily by oral gavage.

### **Murine peripheral blood analyses**

Blood was collected by submandibular bleeding using EDTA-containing tubes (Fisher). Automated peripheral blood counts were obtained using a HemaVet 950 (Drew Scientific) according to standard manufacturer's instruction. Differential blood counts were confirmed on blood smears stained using Wright-Giemsa staining and visualized using a Zeiss Axio Observer A1 microscope (Zeiss).

### **In vitro colony-forming assays.**

For human studies, sorted LN- CD34+CD38+CD90+CD45RA- HSCs or total LN-

CD19- CD10- CD38+CD34+ myeloid progenitors were seeded at a density of 1,000 cells/ml for HSCs and 4,500 cells/ml for myeloid progenitors each in technical triplicates in methylcellulose medium supplemented with cytokines promoting myeloid and erythroid differentiation (MethoCult H4435; STEM CELL Technologies). Colony number and lineage were scored after 14 days.

For murine studies, whole BM cells from *BRafV600E* and littermate *Mx1-cre* *BRafV600E* mice were seeded at a density of 10,000 cells/replicate into myeloid and erythroid cytokine-supplemented methylcellulose medium (Methocult, M3434; STEMCELL Technologies) and 40,000 cells/replicate in rhIL-7 cytokine-supplemented methylcellulose medium (Methocult, M3630; STEMCELL Technologies). Colonies propagated in culture were scored at day 7. Representative colonies were isolated from the plate for cytopins. Remaining cells were resuspended, counted, and a portion was taken for replating (20,000 cells/replicate) for a total of 7 platings.

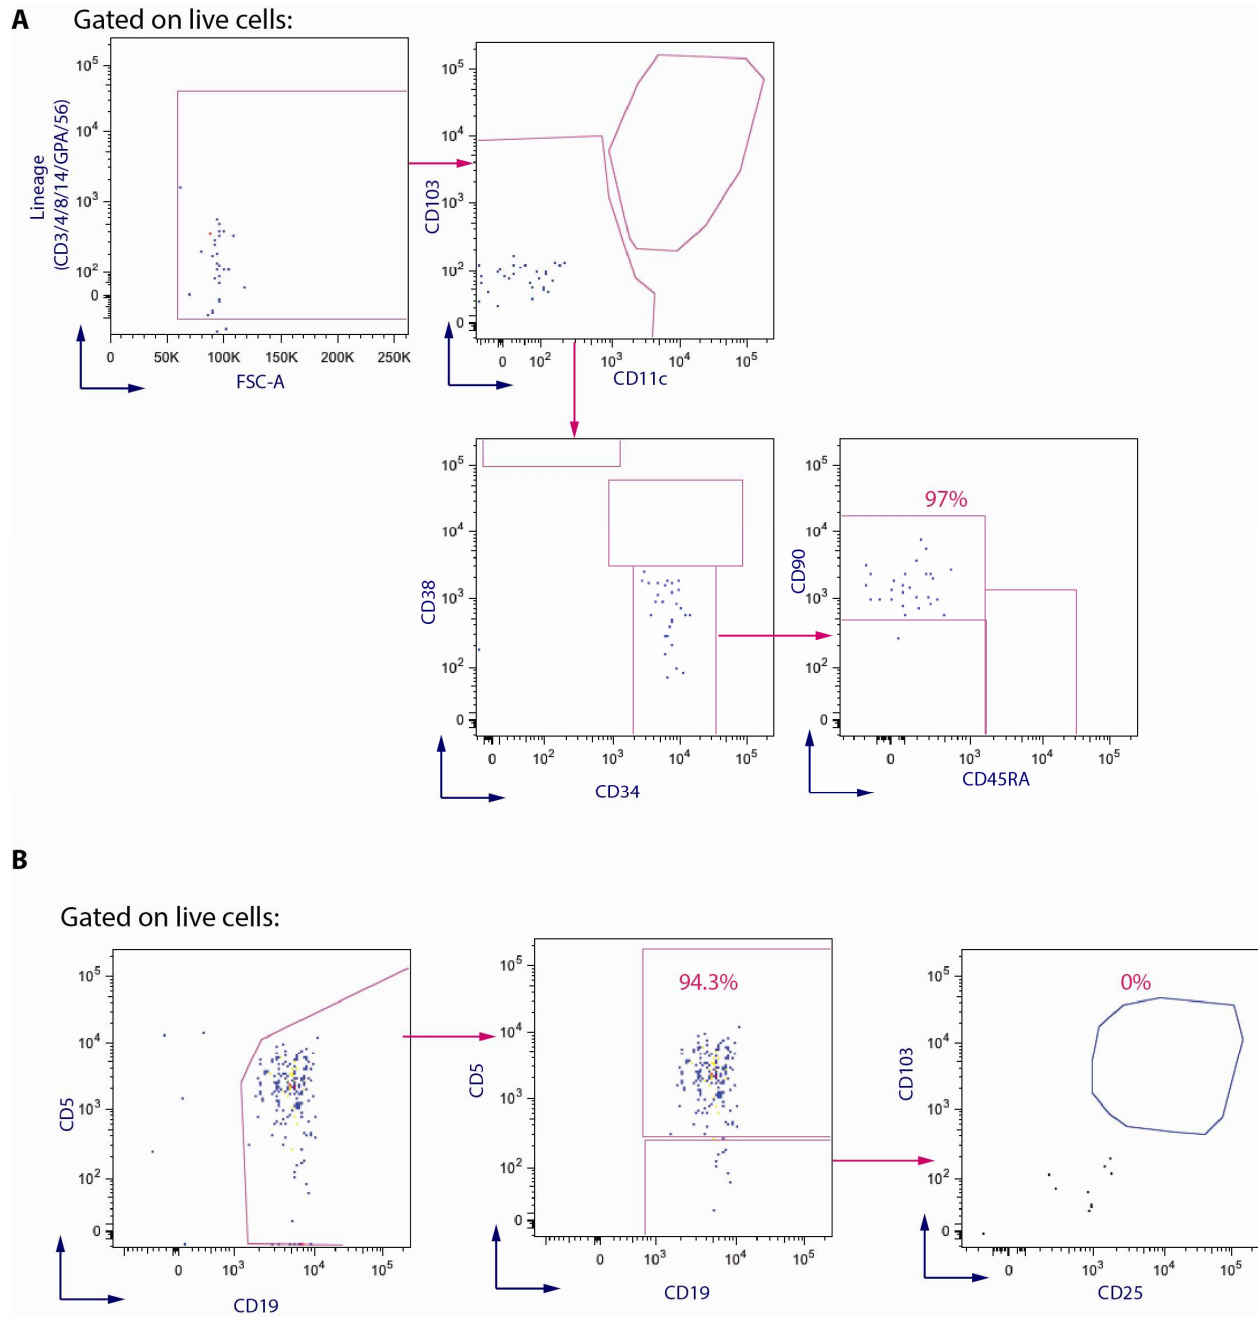

**Fig. S1. HSPC abnormalities in HCL and the presence of *BRAFV600E* in HSCs. (A)** Demonstration of sort purity of HSCs shown in **Fig. 1A** and used for genetic analysis in **Fig. 1C**. Cells were sorted as described in **Fig. 1A** and then each cell population was resorted to ensure lack of contamination prior to genetic analysis of the *BRAFV600E* mutation. **(B)** Sort purity for peripheral blood separation of CLL cells versus HCL cells in an individual with both HCL and CLL as shown in **Fig. 1E**.

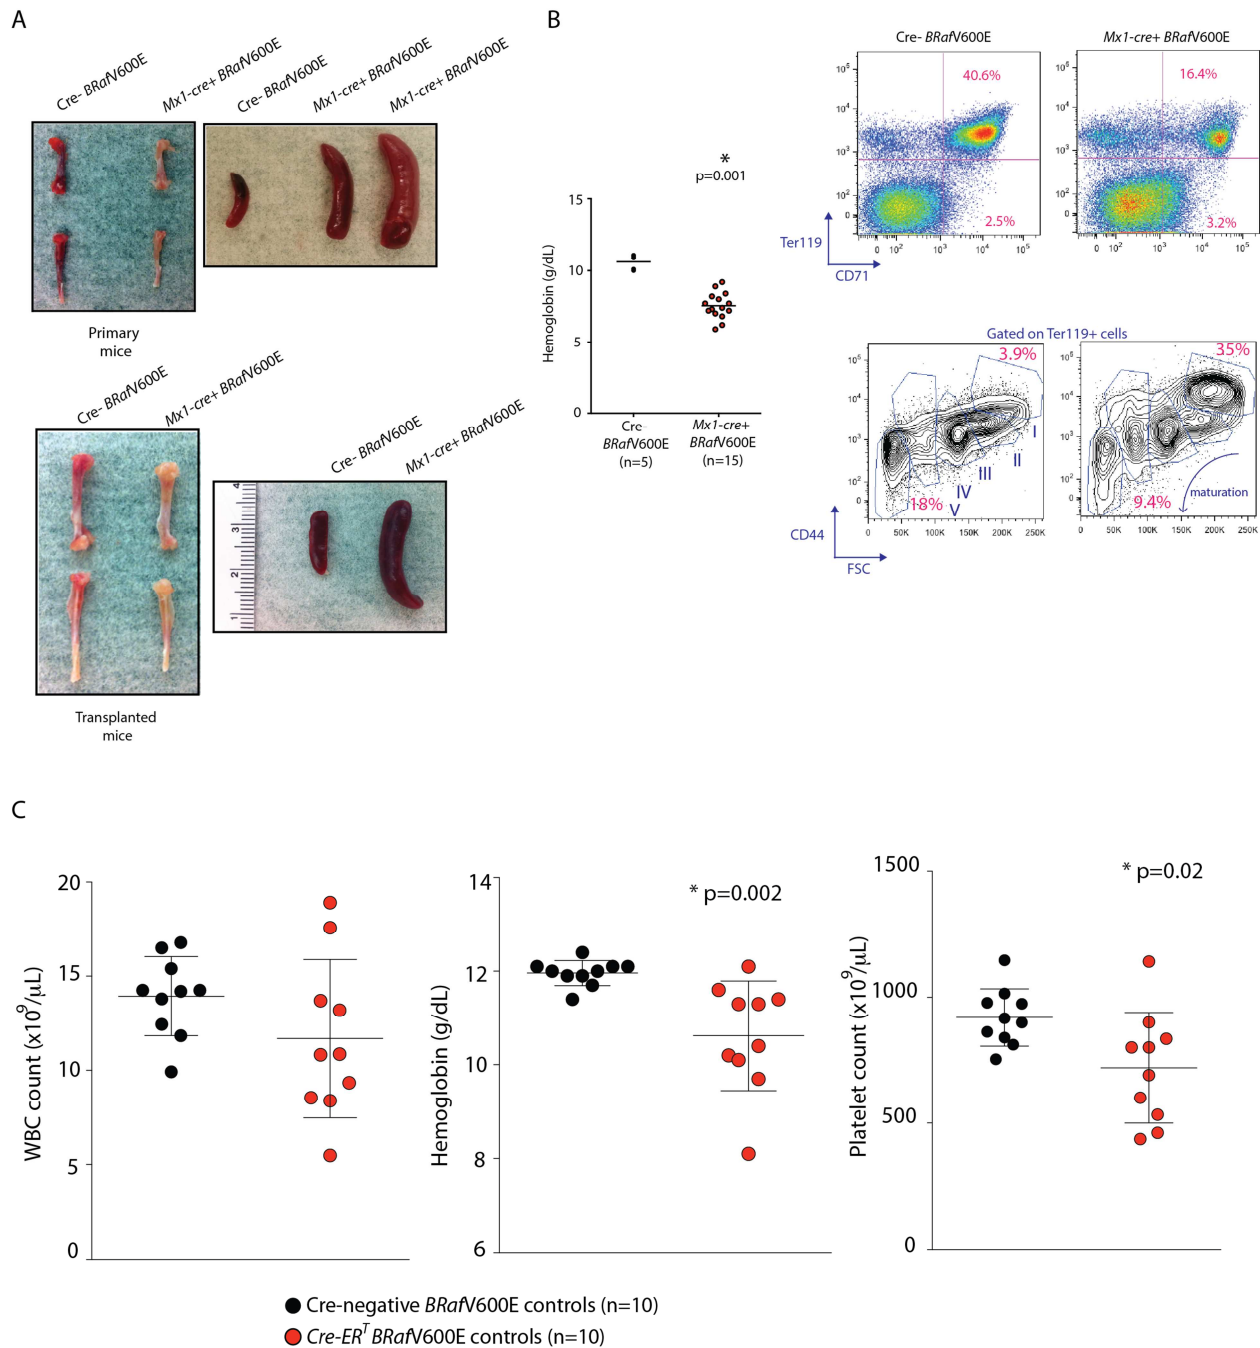

**Fig. S2. Effect of BRAfV600E expression at different time points and stages of hematopoiesis. (A)**

Femurs, tibiae, and spleens of primary *Mx1-cre BRAfV600E* mice and cre-negative controls (top) and wild-type recipient mice transplanted with cre-negative *BRAfV600E* or *Mx1-cre BRAfV600E* BM cells (bottom). **(B)** Quantification of hemoglobin and flow cytometric analysis of erythroid differentiation in BM of cre-negative *BRAfV600E* or *Mx1-cre BRAfV600E* mice with CD71/Ter119 analysis and

erythroblast sub-fractionation based on CD44 versus forward scatter (FSC) (32). (C) Blood counts of mice transplanted with BM from *CreER<sup>T</sup> BRafV600E* (n=10) or Cre-negative (n=10) control mice at 2 weeks after tamoxifen administration. Tamoxifen was administered to recipient mice at 4 weeks post-transplantation.



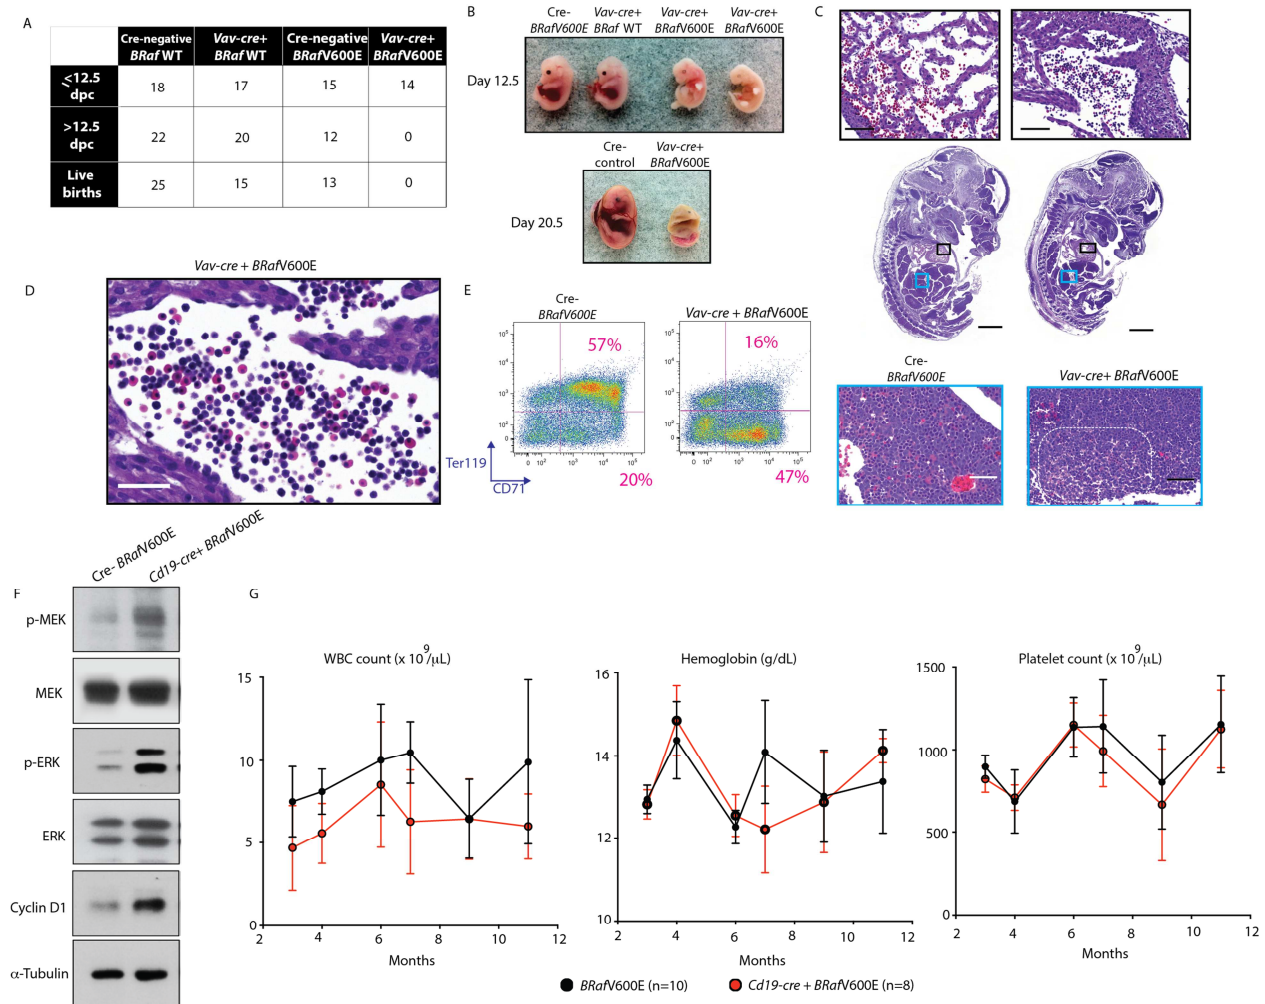

**Fig. S3. Effect of *BRafV600E* expression on fetal hematopoiesis and in mice with B cell–restricted expression of the mutant allele.** (A) *Vav-cre BRafV600E* mice are associated with 100% lethality beyond embryonic day 12.5. (B) *Vav-cre BRafV600E* mice observed at <12.5 day post-conception (dpc) are marked by pallor and are resorbed before birth. (C) Analysis of *Vav-cre BRafV600E* mice before 12.5 dpc reveals leukocytosis (top; scale bar: 50  $\mu$ m) and splenic infarcts (bottom; white encircled area (scale bar: 50  $\mu$ m)). (D) Magnified view of leukocytes within 11.5 dpc *Vav-cre BRafV600E* (scale bar: 50  $\mu$ m). (E) CD71/Ter119 FACS analysis of fetal liver 11.5 dpc. (F) Immunoblot of B220+ cells after culturing lineage-negative Sca1+ c-Kit+ (LSK) cells sorted from *Cd19-cre BRafV600E* or cre-negative control mice in IL-7 for 7 days. (G) Monthly blood counts of *Cd19-cre BRafV600E* and littermate cre-negative control mice. Error bars represent mean  $\pm$  SD.

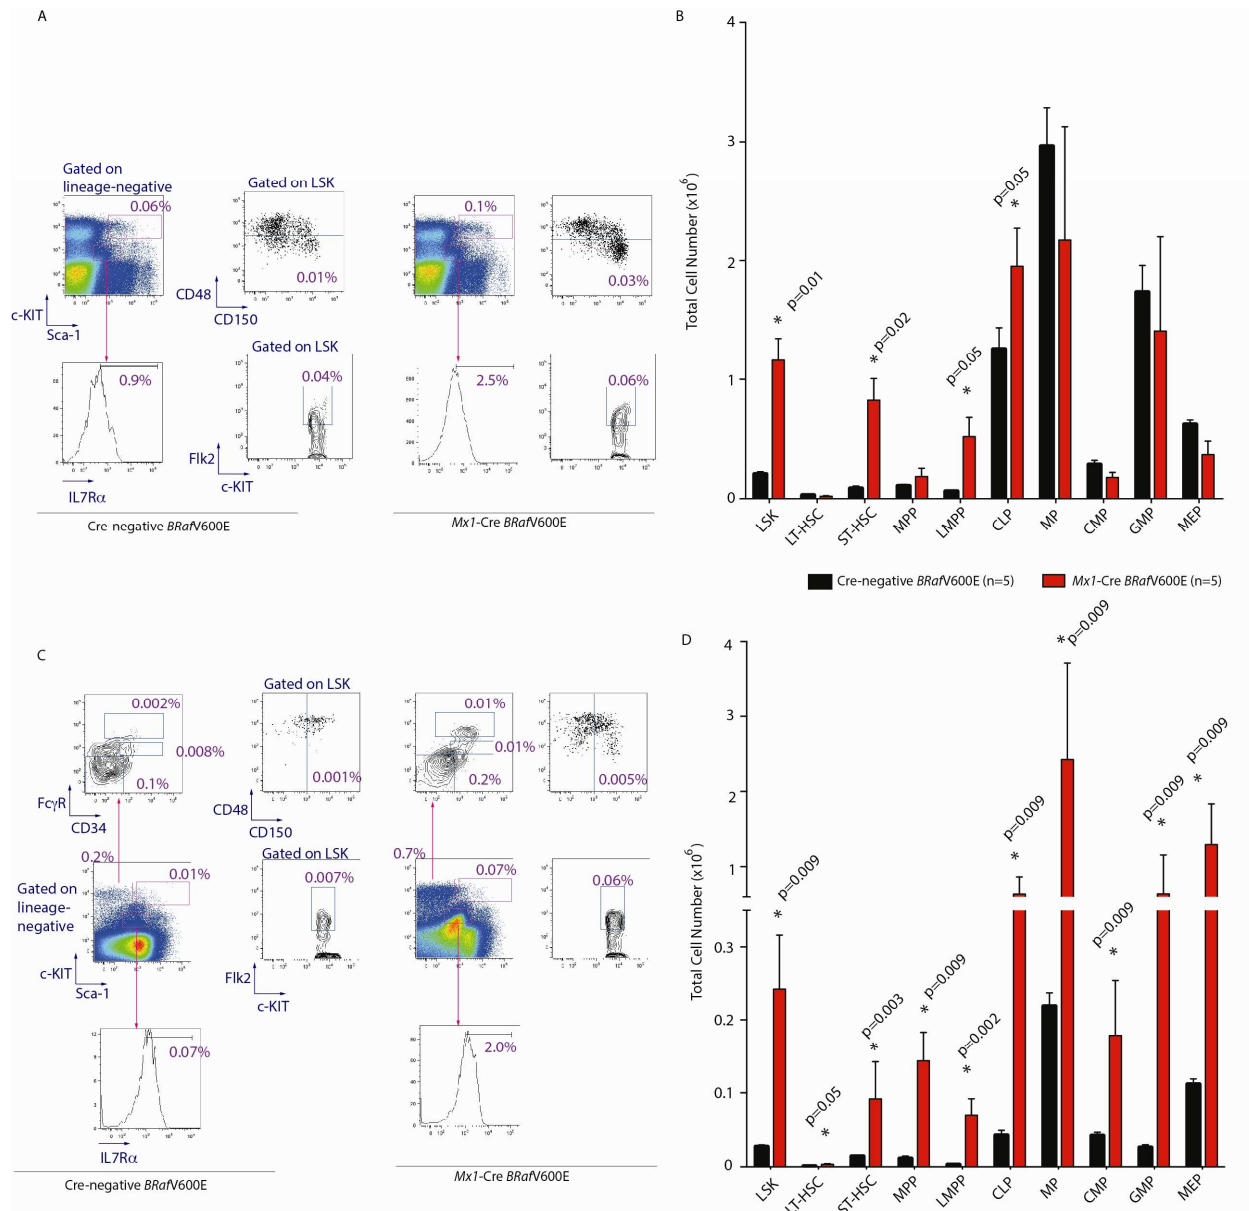

**Fig. S4. Effect of *BRAFV600E* expression on HSPC numbers and frequencies.** HSPCs from the BM and spleen of 5 secondarily transplanted *Mx1-Cre BRAFV600E* mice and 5 similarly treated Cre-negative control mice were analyzed by FACS. Representative frequencies of each HSPC population amongst live cells (A) as well as the absolute number of each population of cells (B) in BM is shown (LT-HSC: long-term hematopoietic stem cell; ST-HSC: short term hematopoietic stem cell; MPP: multipotent progenitor; CLP: common lymphoid progenitor; MP: myeloid progenitor; CMP: common myeloid progenitor; MEP: megakaryocyte/erythroid progenitor). Similarly, representative frequencies (C) as well as the absolute

number of each population of cells (D) in spleen are also shown. Error bars represent mean  $\pm$  SD.

Asterisk represents  $p < 0.05$  (Mann-Whitney U test).

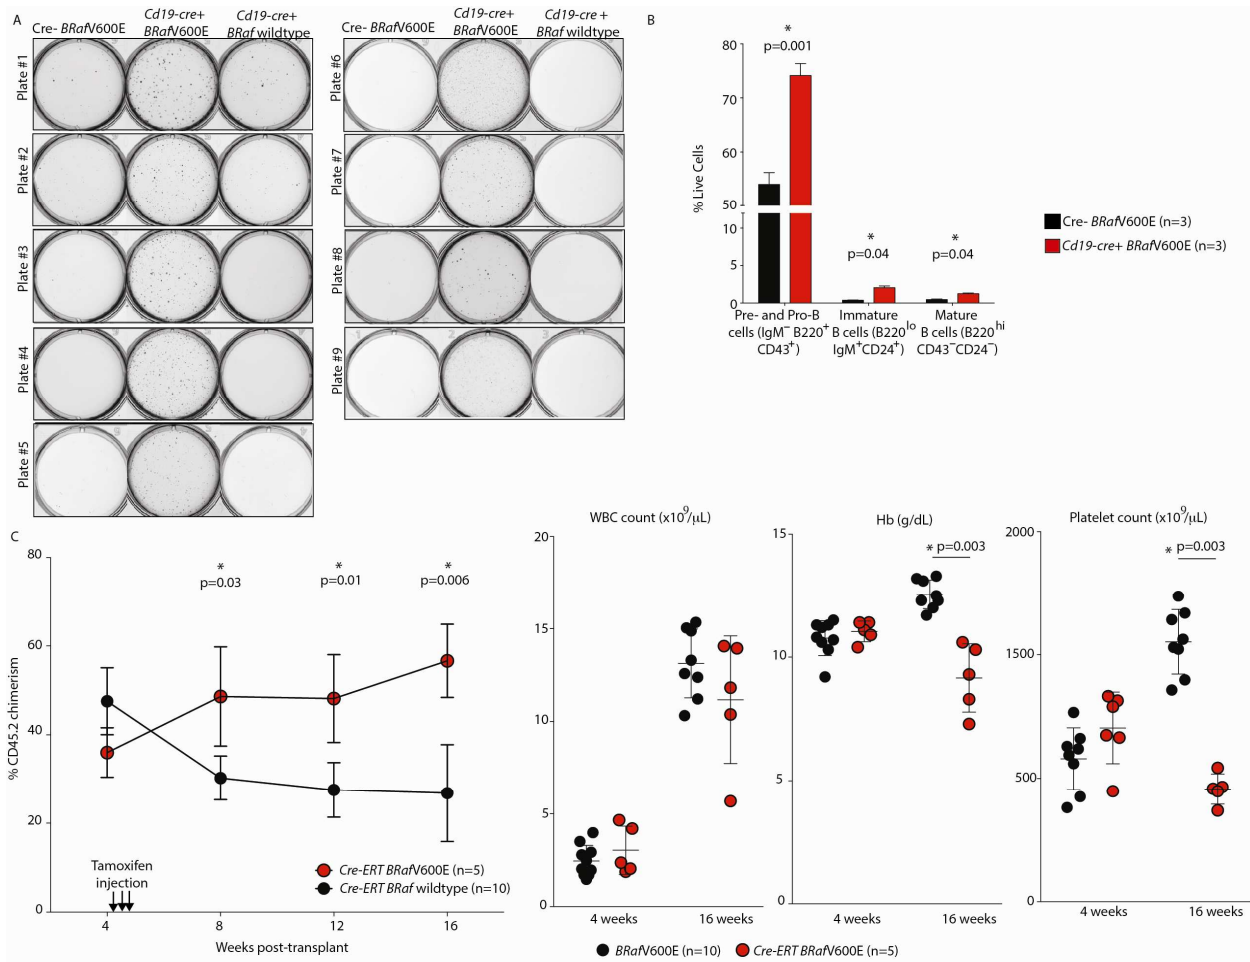

**Fig. S5. Effect of *BRafV600E* expression on B cell development and self-renewal.** (A) Photograph of methylcellulose colony replating assays of whole BM from *Cd19-cre BRafV600E* and control mice grown in rhIL-7. *BRaf* mutant B-cell progenitors could be replated for >9 platings in the presence of rhIL-7, whereas control BM samples could be replated for no more than 3 platings. (B) Flow cytometric assessment of B lineage cells from *BRafV600E* BM cultured in methylcellulose containing rhIL-7. (C) Competitive transplantation of *Cre-ER<sup>T</sup> BRafV600E* or *Cre-ER<sup>T</sup> BRaf* wildtype BM cells followed by activation of the *BRafV600E* mutation by tamoxifen injection 4 weeks after transplantation reveals the competitive advantage of *BRafV600E* mutant hematopoietic cells (arrows indicate time of tamoxifen intraperitoneal injection into recipient mice). Recipient wild-type mice transplanted with *Cre-ER<sup>T</sup> BRafV600E* HSPCs in a competitive manner developed anemia and thrombocytopenia by 16 weeks. Error bars represent mean  $\pm$  SD. Asterisk represents  $p < 0.05$  (Mann-Whitney U test).

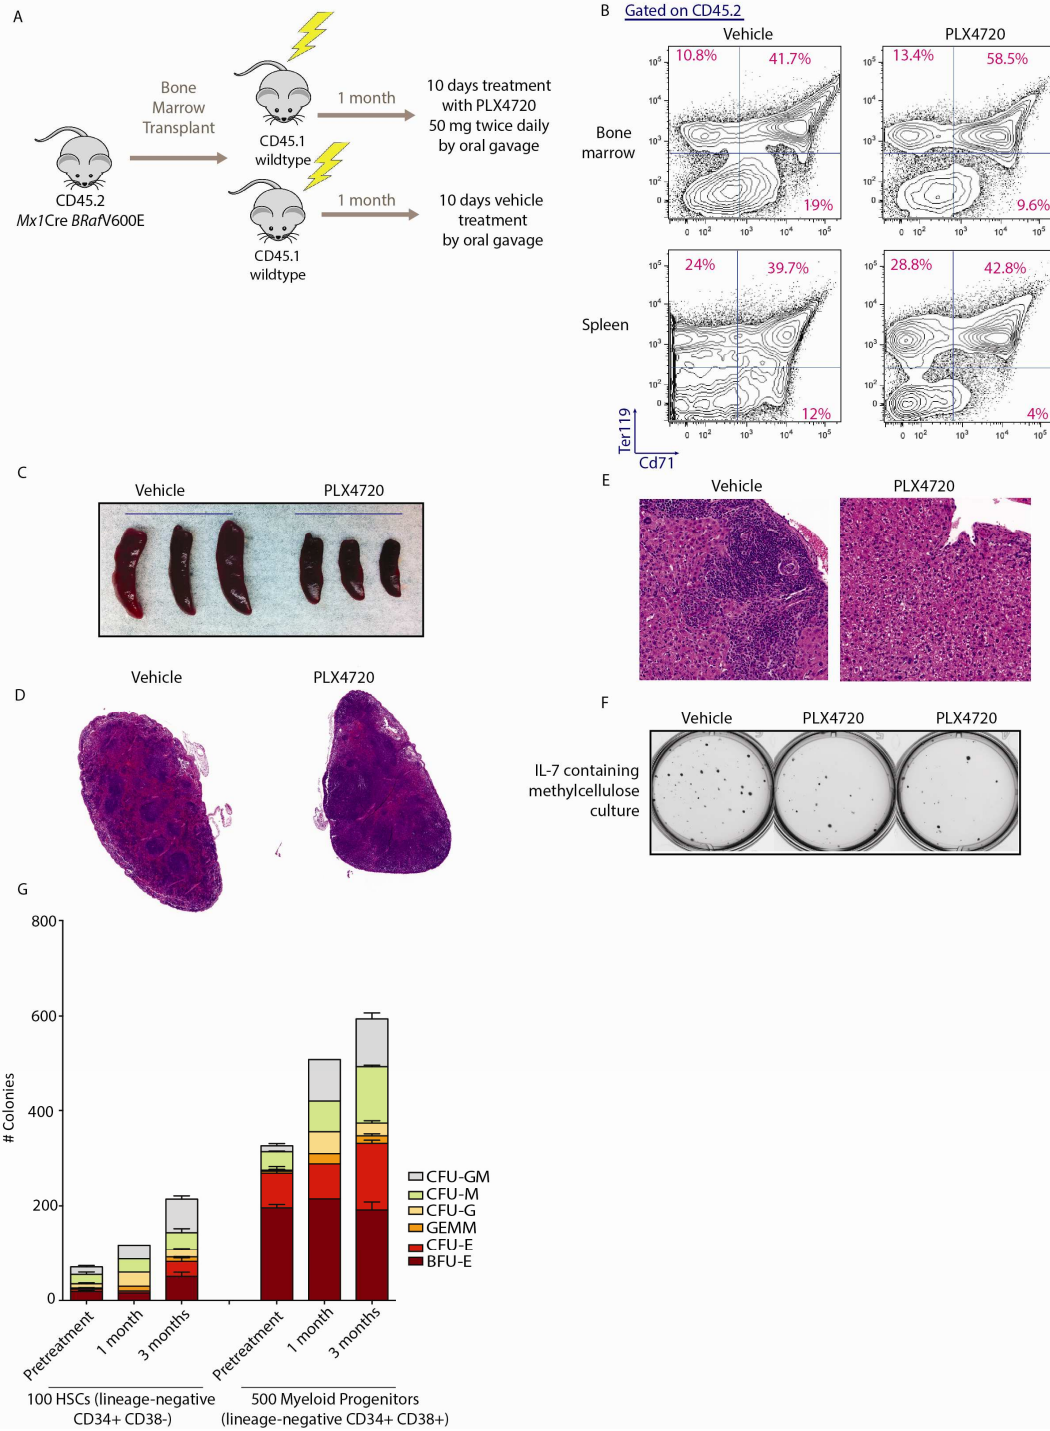

**Fig. S6. Normalization of HSPC compartment and increased myeloid/erythroid output from**

***BRAFV600E*-mutant HSPCs after *BRAF* inhibition. (A) Schema describing in vivo PLX4720**

treatment. Wild-type CD45.1 recipient mice were lethally irradiated and then transplanted with *Mx1-cre*

*BrafV600E* BM cells. Four weeks later, mice were randomized to receive treatment with PLX4720 at 50

mg/kg twice daily or vehicle (5% DMSO, 1% methylcellulose) for 10 days continuously. **(B)** Erythropoiesis in BM and spleen of *Mx1-cre BRAfV600E* mice treated with PLX4720. **(C)** Photographs of gross spleen and **(D)** spleen sections after treatment of *Mx1-cre BRAfV600E* mice with vehicle or PLX4720. Drug-treated mice have smaller spleens with decreased red pulp compared with vehicle-treated mice. **(E)** PLX4720 decreases extramedullary hematopoiesis in liver and **(F)** the ability of B-cell progenitors to proliferate in vitro in rhIL-7. **(G)** Plating of 100 HSCs and 500 myeloid progenitors sorted from BM aspirates of HCL patients before treatment and after 1 and 3 months of therapy (n=3 patients for each timepoint) into myeloid and erythroid cytokine-containing methylcellulose revealed increased clonogenic capacity of these cells after vemurafenib therapy. Error bars represent mean  $\pm$  SD.

**Table S1: Genotyping results of cell populations sorted from HCL patient BM aspirates.**

| Sample | BRAfV600E Allele Specific PCR Qualitative Result |            |          |        |       |       | Comments                                                                                    |
|--------|--------------------------------------------------|------------|----------|--------|-------|-------|---------------------------------------------------------------------------------------------|
|        | BRAfV600E Variant Allele Frequency from MiSeq    |            |          |        |       |       |                                                                                             |
|        | HSC                                              | Hematogone | MP       | HCL    | CD3+  | CD14+ |                                                                                             |
| 1      | Mutant                                           | Mutant     | Wildtype | Mutant | N/A   | N/A   | -                                                                                           |
|        | N/A                                              | N/A        | N/A      | N/A    | N/A   | N/A   |                                                                                             |
| 2      | Mutant                                           | Mutant     | Wildtype | Mutant | N/A   | N/A   | -                                                                                           |
|        | N/A                                              | N/A        | N/A      | N/A    | N/A   | N/A   |                                                                                             |
| 3      | Mutant                                           | Mutant     | N/A      | Mutant | N/A   | N/A   | -                                                                                           |
|        | N/A                                              | N/A        | N/A      | N/A    | N/A   | N/A   |                                                                                             |
| 4      | Wildtype                                         | Mutant     | Wildtype | Mutant | N/A   | N/A   | ARID1A<br>p.V1427fs                                                                         |
|        | 0.06%                                            | 91.5%      | 0.14%    | 95.3%  | N/A   | N/A   |                                                                                             |
| 5      | Mutant                                           | Mutant     | Wildtype | Mutant | N/A   | N/A   | -                                                                                           |
|        | 0.69%                                            | N/A        | N/A      | 42.3%  | N/A   | N/A   |                                                                                             |
| 6      | Mutant                                           | Mutant     | Wildtype | Mutant | N/A   | N/A   | MLL3<br>p.C394Y                                                                             |
|        | N/A                                              | N/A        | N/A      | N/A    | N/A   | N/A   |                                                                                             |
| 7      | Mutant                                           | Wildtype   | Wildtype | Mutant | N/A   | N/A   | -                                                                                           |
|        | 8%                                               | 0.17%      | 0.1%     | 40.7%  | N/A   | N/A   |                                                                                             |
| 8      | N/A                                              | N/A        | N/A      | N/A    | N/A   | N/A   | -                                                                                           |
|        | 8.7%                                             | 0.16%      | 0.08%    | 40.7%  | 0.08% | 0.08% |                                                                                             |
| 9      | N/A                                              | N/A        | N/A      | N/A    | N/A   | N/A   | -                                                                                           |
|        | N/A                                              | N/A        | N/A      | N/A    | 0.07% | 0.04% |                                                                                             |
| 10     | N/A                                              | N/A        | N/A      | N/A    | N/A   | N/A   | -                                                                                           |
|        | N/A                                              | N/A        | N/A      | N/A    | 0.08% | 0.05% |                                                                                             |
| 11     | Mutant                                           | Wildtype   | Wildtype | Mutant | N/A   | N/A   | -                                                                                           |
|        | 7.4%                                             | 0.05%      | 0.08%    | 89.8%  | N/A   | N/A   |                                                                                             |
| 12     | N/A                                              | N/A        | N/A      | N/A    | N/A   | N/A   | -                                                                                           |
|        | N/A                                              | N/A        | N/A      | N/A    | 0.04% | 0.08% |                                                                                             |
| 13     | N/A                                              | N/A        | N/A      | N/A    | N/A   | N/A   | -                                                                                           |
|        | N/A                                              | N/A        | N/A      | N/A    | 0.05% | 0.09% |                                                                                             |
| 14     | Mutant                                           | Mutant     | Wildtype | Mutant | N/A   | N/A   | No<br>mutations<br>seen in<br>extended<br>targeted<br>sequencing<br>other than<br>BRAfV600E |
|        | N/A                                              | N/A        | N/A      | N/A    | N/A   | N/A   |                                                                                             |

**Table S2: Three hundred genes sequenced in three HCL leukemic cell and granulocyte genomic DNA samples.**

| Gene Symbol of Genes Sequenced |          |          |        |         |          |
|--------------------------------|----------|----------|--------|---------|----------|
| ABL1                           | CEBPA    | FBXO11   | KCNJ5  | NOTCH2  | RICTOR   |
| ABL2                           | CHEK1    | FBXW7    | KDM5C  | NOTCH3  | RNF43    |
| AKT1                           | CHEK2    | FGFR1    | KDM6A  | NOTCH4  | ROR2     |
| AKT2                           | CIC      | FGFR2    | KDR    | NPM1    | ROS1     |
| AKT3                           | CREBBP   | FGFR3    | KEAP1  | NRAS    | RPS6KB1  |
| ALK                            | CRKL     | FGFR4    | KIT    | NTRK1   | RPTOR    |
| ALOX12B                        | CRLF2    | FH       | KLF6   | NTRK2   | RUNX1    |
| APC                            | CSF1R    | FKBP1A   | KRAS   | NTRK3   | SDHB     |
| AR                             | CTCF     | FLCN     | LDHA   | PAK7    | SETD2    |
| ARAF                           | CTNNB1   | FLT1     | LGR6   | PALB2   | SF3B1    |
| ARHGAP26                       | CYLD     | FLT3     | LMO1   | PARK2   | SHQ1     |
| ARID1A                         | DAXX     | FLT4     | MAGI2  | PARP1   | SMAD2    |
| ARID1B                         | DDR2     | FOXL2    | MAP2K1 | PAX5    | SMAD3    |
| ARID2                          | DICER1   | FUBP1    | MAP2K2 | PBRM1   | SMAD4    |
| ASXL1                          | DIS3     | GATA1    | MAP2K4 | PDGFRA  | SMARCA4  |
| ATM                            | DNMT1    | GATA2    | MAP3K1 | PDGFRB  | SMARCB1  |
| ATR                            | DNMT3A   | GATA3    | MAP3K8 | PHOX2B  | SMO      |
| ATRX                           | DNMT3B   | GLI1     | MAPK1  | PIK3CG  | SOCS1    |
| AURKA                          | E2F3     | GLI3     | MCL1   | PIK3CA  | SOX2     |
| BAP1                           | EGFR     | GNA11    | MDM2   | PIK3CB  | SPOP     |
| BCL2L1                         | EIF4EBP1 | GNAQ     | MDM4   | PIK3CD  | SRC      |
| BCL2L11                        | EP300    | GNAS     | MED12  | PIK3CG  | SRSF2    |
| BCL6                           | EPHA10   | GOLPH3   | MEF2B  | PIK3R1  | STAG2    |
| BCOR                           | EPHA2    | GRIN2A   | MEN1   | PIK3R2  | STK11    |
| BIRC2                          | EPHA3    | GRM3     | MET    | PIK3R3  | SUFU     |
| BRAF                           | EPHA4    | GSK3B    | MITF   | PKM2    | SYK      |
| BRCA1                          | EPHA5    | HDAC2    | MLH1   | PLK2    | TBK1     |
| BRCA2                          | EPHA6    | HIF1A    | MLL    | PMS2    | TEK      |
| BUB1B                          | EPHA7    | HLA-A    | MLL2   | PNRC1   | TERT     |
| CARD11                         | EPHA8    | HMGA2    | MLL3   | POLE    | TET1     |
| CBL                            | EPHB1    | HNF1A    | MLST8  | PPP2R1A | TET2     |
| CBLB                           | EPHB2    | HRAS     | MPL    | PPP6C   | TGFBR2   |
| CBLC                           | EPHB3    | HSP90AA1 | MRE11A | PRDM1   | TMPPRSS2 |
| CCND1                          | EPHB4    | IDH1     | MSH2   | PREX2   | TNFAIP3  |
| CCND2                          | EPHB6    | IDH2     | MSH6   | PRKAA2  | TNFRSF14 |
| CCND3                          | ERBB2    | IGF1R    | MTOR   | PRKAR1A | TOP1     |
| CCNE1                          | ERBB3    | IGFBP7   | MYB    | PRKCI   | TP53     |
| CD79B                          | ERBB4    | IKBKE    | MYC    | PTCH1   | TP63     |
| CDC42EP2                       | ERCC2    | IKZF1    | MYCL1  | PTEN    | TSC1     |
| CDC73                          | ERCC5    | IL7R     | MYCN   | PTPN11  | TSC2     |
| CDH1                           | ERG      | INPP4A   | MYD88  | PTPRD   | TSHR     |
| CDH11                          | ESR1     | INPP4B   | NBN    | PTPRS   | U2AF1    |
| CDK12                          | ETV1     | INSR     | NCOA2  | PTPRT   | VHL      |
| CDK4                           | ETV6     | IRF4     | NF1    | RAC1    | WAS      |
| CDK6                           | EZH2     | IRS1     | NF2    | RAD50   | WNK1     |
| CDK8                           | FAM123B  | IRS2     | NFE2L2 | RAF1    | WT1      |
| CDKN1A                         | FAM46C   | JAK1     | NFKB1  | RARA    | XPO1     |
| CDKN2A                         | FAS      | JAK2     | NFKB2  | RB1     | YAP1     |
| CDKN2B                         | FAT1     | JAK3     | NKX2-1 | REL     | YES1     |
| CDKN2C                         | FAT4     | JUN      | NOTCH1 | RET     | ZRSR2    |
